# Supplementary material for: Exploring the Papillomaviral Proteome to Identify Potential Candidates for a Chimeric Vaccine against Cervix Papilloma Using Immunomics and Computational Structural Vaccinology
Source: MDPI journal article supplement (doi:10.3390/v11010063), 2019-01-15
Supplement: s1 [file s1]

# **Exploring papillomaviral proteome to identify potential candidates for chimeric vaccine against cervix papilloma using immunomics and computational structural vaccinology**

Satyavani Kaliyamurthi<sup>1,2</sup>, Gurudeeban Selvaraj<sup>1,2</sup>, Sathishkumar Chinnasamy<sup>3</sup>, Qiankun Wang<sup>3</sup>, Asma Sindhoo Nangraj<sup>3</sup>, William C Cho<sup>4</sup>,

Keren Gu<sup>1,2</sup>, Dong-Qing Wei<sup>1,3\*</sup>

<sup>1</sup>Center of Interdisciplinary Science-Computational Life Sciences, College of Food Science and Engineering, Henan University of Technology, Zhengzhou High-tech Industrial Development Zone, 100 Lianhua Street, Zhengzhou, Henan 450001, China

<sup>2</sup>College of Chemistry, Chemical Engineering and Environment, Henan University of Technology, Zhengzhou High-tech Industrial Development Zone, 100 Lianhua Street, Zhengzhou, Henan 450001, China.

<sup>3</sup>The State Key Laboratory of Microbial Metabolism, College of Life Sciences and Biotechnology, Shanghai Jiao Tong University, No: 800 Dongchuan Road, Minhang, Shanghai, 200240, China

<sup>4</sup>Department of Clinical Oncology, Queen Elizabeth Hospital, Kowloon, Hong Kong

### Supplementary Tables

**Table S1** .The overlapped epitope segments of MHC-I, CTL and TCR from N-terminal region of HPV58 were predicted by using different servers

| MHC-I             |                         | CTL                  | TCR-peptide/peptide-MHC interfaces |
|-------------------|-------------------------|----------------------|------------------------------------|
| IEDB <sup>a</sup> | NetMHC 4.0 <sup>b</sup> | CTLPred <sup>c</sup> | PAComplex <sup>d</sup>             |
| 23-36             | 23-35                   | 16-24                | 19-27                              |
| 30-43             | 29-42                   | 40-48                | 38-46                              |
| 10-23             | 9-22                    | 16-24                | 4-12                               |
|                   |                         | 4-12                 |                                    |
| 29-42             | 28-41                   | 38-46                | 38-46                              |

MHC-I overlapped epitope segments prediction by using different tools as <sup>a</sup>IEDB consensus and <sup>b</sup>NetMHC4.0; CTL epitopes prediction by using CTLPred; TCR-peptide and peptide-MHC interface predicted by PAComplex

**Table S2.** The overlapped epitope segments of MHC-II, INF-gamma producing and B-cell epitopes N-terminal region of HPV58 by using different servers

| MHC-II                      |                       | INF- $\gamma$ producing epitopes | B-cell epitopes      |
|-----------------------------|-----------------------|----------------------------------|----------------------|
| <sup>a</sup> IEDB consensus | <sup>b</sup> Tepitool | <sup>c</sup> INFepitope          | <sup>d</sup> ABCPred |
| 23-36                       | 23-36                 | 0.51                             | 26-41                |
| 23-37                       | 23-37                 | 0.53                             |                      |
| 29-43                       | 29-43                 | +1                               | 26-41                |
| 30-44                       | 30-44                 | +1                               |                      |
| 7-21                        | 7-21                  | +1                               | 7-22                 |
| 6-20                        | 6-20                  | +1                               |                      |
| 29-43                       | 29-43                 | +1                               | 33-48                |
| 28-42                       | 28-42                 | +1                               |                      |

MHC-II overlapped epitope segments prediction by using different tools as <sup>a</sup>IEDB consensus and <sup>b</sup>Tepitool; INF- $\gamma$  production of the overlapped epitope segments by using INFepitope; Overlapped B-cell linear epitope segments prediction by using ABCPred

**Table S3.** Conservation across-hrHPV strains by the overlapped HPV58 epitope segments

| S.No. | Epitopes              | Positions | Protein sub sequences | Identity (%) | Name of the Strain |
|-------|-----------------------|-----------|-----------------------|--------------|--------------------|
| 1     | <b>CKASGTCPPDVIPK</b> | 21-34     | <b>CKASGTCPPDVIPK</b> | 100.00%      | HPV52              |
| 2     |                       | 21-34     | <b>CKASGTCPPDVIPK</b> | 100.00%      | HPV58              |
| 3     |                       | 21-34     | <b>CKATGTCPPDVIPK</b> | 92.86%       | HPV33              |
| 4     |                       | 22-35     | <b>CKAAGTCPPDVIPK</b> | 92.86%       | HPV35              |
| 5     |                       | 21-34     | <b>CKAAGTCPPDVIPK</b> | 92.86%       | HPV69              |
| 6     |                       | 21-34     | <b>CKAAGTCPPDVIPK</b> | 92.86%       | HPV82              |
| 7     |                       | 21-34     | <b>CKQSGTCPPDVVPK</b> | 85.71%       | HPV18              |
| 8     |                       | 22-35     | <b>CKAAGTCPSDVIPK</b> | 85.71%       | HPV31              |
| 9     |                       | 21-34     | <b>CKQSGTCPPDVINK</b> | 85.71%       | HPV45              |
| 10    |                       | 23-36     | <b>CKQAGTCPPDVIPK</b> | 85.71%       | HPV73              |
| 11    |                       | 22-35     | <b>CKQAGTCPPDIIPK</b> | 78.57%       | HPV16              |
| 12    |                       | 21-34     | <b>CKQSGTCPPDVVDK</b> | 78.57%       | HPV39              |
| 13    |                       | 21-34     | <b>CKAAGTCPPDVVNK</b> | 78.57%       | HPV51              |
| 14    |                       | 21-34     | <b>CKQSGTCPSDVINK</b> | 78.57%       | HPV68              |
| 15    |                       | 21-34     | <b>CKLSGTCPEDVVNK</b> | 71.43%       | HPV56              |
| 16    |                       | 21-34     | <b>CKQAGTCPSDVINK</b> | 71.43%       | HPV59              |
| 1     | <b>KVEGTTIADQILRY</b> | 34-47     | <b>KVEGTTIADQILRY</b> | 100.00%      | HPV58              |
| 2     |                       | 35-48     | <b>KIEHTTIADQILRY</b> | 85.71%       | HPV31              |
| 3     |                       | 34-47     | <b>KVEGSTIADQILKY</b> | 85.71%       | HPV33              |
| 4     |                       | 34-47     | <b>KVEGTTIADQLLKY</b> | 85.71%       | HPV52              |
| 5     |                       | 35-48     | <b>KVEGKTIAEQILQY</b> | 78.57%       | HPV16              |
| 6     |                       | 35-48     | <b>KVEGNTVADQILKY</b> | 78.57%       | HPV35              |
| 7     |                       | 36-49     | <b>KVEGSTIADNILKY</b> | 78.57%       | HPV73              |
| 8     |                       | 34-47     | <b>KVEGTTLADKILQW</b> | 71.43%       | HPV18              |
| 9     |                       | 34-47     | <b>KVEGTTLADKILQW</b> | 71.43%       | HPV39              |
| 10    |                       | 34-47     | <b>KVEGTTLADKILQW</b> | 71.43%       | HPV45              |
| 11    |                       | 34-47     | <b>KVEGTTLADKILQW</b> | 71.43%       | HPV51              |

|    |                |       |                |         |       |
|----|----------------|-------|----------------|---------|-------|
| 12 |                | 34-47 | KVEGTTLADKILQW | 71.43%  | HPV59 |
| 13 |                | 34-47 | KVEGTTLADKILQW | 71.43%  | HPV68 |
| 14 |                | 34-47 | KVEGTTLADKILQW | 71.43%  | HPV82 |
| 15 |                | 34-47 | KIEGSTLADKILQW | 57.14%  | HPV69 |
| 16 |                | 34-47 | KIEQKTWADRILQW | 50.00%  | HPV56 |
|    | IADQILRYGSLGVF | 40-53 | IADQILRYGSLGVF | 100.00% | HPV58 |
| 1  |                | 41-54 | IADQILRYGSMGVF | 92.86%  | HPV31 |
| 2  |                | 40-53 | IADQILKYGSLGVF | 92.86%  | HPV33 |
| 3  |                | 40-53 | IADQLLKYGSLGVF | 85.71%  | HPV52 |
| 4  |                | 41-54 | IAEQILQYGSMGVF | 78.57%  | HPV16 |
| 5  |                | 42-55 | IADNILKYGSIGVF | 78.57%  | HPV73 |
| 6  |                | 41-54 | VADQILKYGSMAVF | 71.43%  | HPV35 |
| 7  |                | 40-53 | LADKILQWSSLGIF | 57.14%  | HPV18 |
| 8  |                | 40-53 | LADKILQWTSLGIF | 57.14%  | HPV39 |
| 9  |                | 40-53 | LADKILQWSSLGIF | 57.14%  | HPV45 |
| 10 |                | 40-53 | LADKILQWTSLGIF | 57.14%  | HPV59 |
| 11 |                | 40-53 | LADKILQWTSLGIF | 57.14%  | HPV68 |
| 12 |                | 40-53 | LADKILQWSGLGIF | 50.00%  | HPV51 |
| 13 |                | 40-53 | WADRILQWGSIFTY | 50.00%  | HPV56 |
| 14 |                | 40-53 | LADKILQWSGLGIF | 50.00%  | HPV69 |
| 15 |                | 40-53 | LADKILQWSGLGIF | 50.00%  | HPV82 |
| 16 |                | 40-53 | IADQILRYGSLGVF | 100.00% | HPV58 |
| 1  | ADQILRYGSLGVFF | 41-54 | ADQILRYGSLGVFF | 100.00% | HPV58 |
| 2  |                | 42-55 | ADQILRYGSMGVFF | 92.86%  | HPV31 |
| 3  |                | 41-54 | ADQILKYGSLGVFF | 92.86%  | HPV33 |
| 4  |                | 41-54 | ADQLLKYGSLGVFF | 85.71%  | HPV52 |
| 5  |                | 42-55 | AEQILQYGSMGVFF | 78.57%  | HPV16 |
| 6  |                | 42-55 | ADQILKYGSMAVFF | 78.57%  | HPV35 |
| 7  |                | 43-56 | ADNILKYGSIGVFF | 78.57%  | HPV73 |
| 8  |                | 41-54 | ADKILQWSSLGIFL | 57.14%  | HPV18 |
| 9  |                | 41-54 | ADKILQWTSLGIFL | 57.14%  | HPV39 |
| 10 |                | 41-54 | ADKILQWSSLGIFL | 57.14%  | HPV45 |

|    |       |                |        |       |
|----|-------|----------------|--------|-------|
| 11 | 41-54 | ADRILQWGSLFTYF | 57.14% | HPV56 |
| 12 | 41-54 | ADKILQWTSLGIFL | 57.14% | HPV59 |
| 13 | 41-54 | ADKILQWTSLGIFL | 57.14% | HPV68 |
| 14 | 41-54 | ADKILQWSGLGIFL | 50.00% | HPV51 |
| 15 | 41-54 | ADKILQWSGLGIFL | 50.00% | HPV69 |
| 16 | 41-54 | ADKILQWSGLGIFL | 50.00% | HPV82 |

Residues that are different from their corresponding residue in the reference sequence are highlighted in red color. Identity indicates the number (%) of residues in the homologous sequences that are identical to the corresponding residue in the reference sequence

**Table S4.** Validation of 3D structures of the designed SGD58 obtained by the I-TASSER and Robetta and its refinement by the Galaxy Refine (named as I-T Gal) and 3Drefine (named as I-T 3DR)

| Model                  | ProSA        | ERRAT                  | RAMPAGE            |                 |                 |
|------------------------|--------------|------------------------|--------------------|-----------------|-----------------|
|                        | z-score      | Overall quality factor | Favored region     | Allowed region  | Outlier region  |
| I-TASSER               | -5.76        | 83.2258                | 249 (78.8%)        | 44 (13.9%)      | 23 (7.3%)       |
| I-T Gal1               | -5.54        | 75.6494                | 282 (89.2%)        | 23 (7.3%)       | 11 (3.5%)       |
| I-T Gal2               | -5.55        | 75.1613                | 281 (88.9%)        | 22 (7.0%)       | 13 (4.1%)       |
| I-T Gal3               | -5.77        | 88.889                 | 280 (88.6%)        | 24 (7.6%)       | 12 (3.8%)       |
| I-T Gal4               | -5.63        | 79.8701                | 279 (88.3%)        | 24 (7.6%)       | 13 (4.1%)       |
| I-T Gal5               | -5.75        | 77.7419                | 280 (88.6%)        | 24 (7.6%)       | 12 (3.8%)       |
| I-T 3DR1               | -5.72        | 86.8056                | 261 (82.6%)        | 35 (11.1%)      | 20 (6.3%)       |
| I-T 3DR2               | -5.72        | 88.8114                | 259 (82.0%)        | 32 (10.1%)      | 25 (7.9%)       |
| I-T 3DR3               | -5.87        | 88.8112                | 258 (81.6%)        | 35 (11.1%)      | 23 (7.3%)       |
| I-T 3DR4               | -5.86        | 88.8112                | 259 (82.0%)        | 30 (9.5%)       | 27 (8.5%)       |
| I-T 3DR5               | -5.89        | 80.9677                | 259 (82.0%)        | 30 (9.5%)       | 27 (8.5%)       |
| Robetta-Model-1        | -5.91        | 93.2258                | 306 (96.8%)        | 10 (3.2%)       | 0 (0.0%)        |
| Robetta-Model-2        | -6.01        | 96.1291                | 308 (97.5%)        | 6 (1.9%)        | 2 (0.6%)        |
| <b>Robetta-Model-3</b> | <b>-6.65</b> | <b>99.0033</b>         | <b>306 (96.8%)</b> | <b>9 (2.8%)</b> | <b>1 (0.3%)</b> |
| Robetta-Model-4        | -5.21        | 92.1233                | 307 (97.2%)        | 6 (1.9%)        | 3 (0.9%)        |
| Robetta-Model-5        | -5.64        | 98.3871                | 311 (98.4%)        | 4 (1.3%)        | 1 (0.3%)        |
| Robetta M3 Gal1        | -6.51        | 95.9732                | 311 (98.4%)        | 4 (1.3%)        | 1 (0.3%)        |
| Robetta M3 Gal2        | -6.29        | 95.2218                | 310 (98.1%)        | 5 (1.6%)        | 1 (0.3%)        |
| Robetta M3 Gal3        | -6.32        | 97.9798                | 311 (98.4%)        | 4 (1.3%)        | 1 (0.3%)        |

|                 |       |         |             |           |          |
|-----------------|-------|---------|-------------|-----------|----------|
| Robetta M3 Gal4 | -6.48 | 94.6488 | 310 (98.1%) | 5 (1.6%)  | 1 (0.3%) |
| Robetta M3 Gal5 | -6.57 | 96.5871 | 311 (98.4%) | 4 (1.3%)  | 1 (0.3%) |
| Robetta M3 3DR1 | -6.46 | 97.0968 | 304 (96.2%) | 10 (3.2%) | 2 (0.6%) |
| Robetta M3 3DR2 | -6.43 | 96.7742 | 305 (96.5%) | 9 (2.8%)  | 2 (0.6%) |
| Robetta M3 3DR3 | -6.37 | 96.7742 | 304 (96.2%) | 9 (2.8%)  | 3 (0.9%) |
| Robetta M3 3DR4 | -6.38 | 96.7742 | 304 (96.2%) | 9 (2.8%)  | 3 (0.9%) |
| Robetta M3 3DR5 | -6.35 | 97.0968 | 304 (96.2%) | 9 (2.8%)  | 3 (0.9%) |

The Robetta-Model-3 structure was chosen as the most appropriate model, which is shown in bold; M3 –model 3

**Table S5.** Validation of 3D structures of the TLR5 obtained by the I-TASSER and Robetta and its refinement by the GalaxyRefine (named as I-T Gal) and 3Drefine (named as I-T 3DR)

| Model                  | ProSA        | ERRAT                  | RAMPAGE            |                  |                 |
|------------------------|--------------|------------------------|--------------------|------------------|-----------------|
|                        | Z-score      | Overall quality factor | Favored region     | Allowed region   | Outlier region  |
| I-TASSER               | -5.93        | 79.7619                | 635 (74.2%)        | 169 (19.7%)      | 52 (6.1%)       |
| I-T Gal1               | -6.52        | 68.9781                | 779 (91.0%)        | 71 (8.3%)        | 6 (0.7%)        |
| I-T Gal2               | -6.35        | 73.7864                | 778 (90.9%)        | 70 (8.2%)        | 8 (0.9%)        |
| I-T Gal3               | -6.64        | 73.3414                | 783 (91.5%)        | 65 (7.6%)        | 8 (0.9%)        |
| I-T Gal4               | -6.65        | 70.3163                | 785 (91.7%)        | 63 (7.4%)        | 8 (0.9%)        |
| I-T Gal5               | -6.61        | 72.6176                | 782 (91.4%)        | 68 (7.9%)        | 6 (0.7%)        |
| I-T 3DR1               | -6.47        | 85.967                 | 699 (81.7%)        | 118 (13.8%)      | 39 (4.6%)       |
| I-T 3DR2               | -6.52        | 86.3208                | 708 (82.7%)        | 109 (12.7%)      | 39 (4.6%)       |
| I-T 3DR3               | -6.53        | 86.6745                | 714 (83.4%)        | 102 (11.9%)      | 40 (4.7%)       |
| I-T 3DR4               | -6.63        | 86.4387                | 713 (83.3%)        | 102 (11.9%)      | 41 (4.8%)       |
| I-T 3DR5               | -6.77        | 87.6179                | 712 (83.2%)        | 103 (12.0%)      | 41 (4.8%)       |
| Robetta-Model-1        | -7.2         | 87.6847                | 792 (94.7%)        | 40 (4.8%)        | 4 (0.5%)        |
| Robetta-Model-2        | -7.02        | 92.0147                | 781 (93.4%)        | 48 (5.7%)        | 7 (0.8%)        |
| Robetta-Model-3        | -7.51        | 89.7277                | 792 (94.7%)        | 36 (4.3%)        | 8 (1.0%)        |
| Robetta-Model-4        | -6.91        | 89.9272                | 799 (95.6%)        | 30 (3.6%)        | 7 (0.8%)        |
| <b>Robetta-Model-5</b> | <b>-6.71</b> | <b>92.1472</b>         | <b>785 (93.9%)</b> | <b>45 (5.4%)</b> | <b>6 (0.7%)</b> |
| Robetta M5 Gal1        | -7.11        | 82.4691                | 803 (96.1%)        | 31 (3.7%)        | 2 (0.2%)        |
| Robetta M5 Gal2        | -7.08        | 85.7673                | 807 (96.5%)        | 24 (2.9%)        | 5 (0.6%)        |

|                 |       |         |             |           |           |
|-----------------|-------|---------|-------------|-----------|-----------|
| Robetta M5 Gal3 | -7.12 | 85.5911 | 803 (96.1%) | 28 (3.3%) | 5 (0.6%)  |
| Robetta M5 Gal4 | -7.14 | 84.8708 | 806 (96.4%) | 25 (3.0%) | 5 (0.6%)  |
| Robetta M5 Gal5 | -7.01 | 85.0307 | 809 (96.8%) | 24 (2.9%) | 3 (0.4%)  |
| Robetta M5 3DR1 | -6.85 | 90.6781 | 764 (91.4%) | 63 (7.5%) | 9 (1.1%)  |
| Robetta M5 3DR2 | -6.92 | 89.7219 | 765 (91.5%) | 62 (7.4%) | 9 (1.1%)  |
| Robetta M5 3DR3 | -6.92 | 89.3720 | 763 (91.3%) | 64 (7.7%) | 9 (1.1%)  |
| Robetta M5 3DR4 | -6.92 | 90.0966 | 762 (91.1%) | 64 (7.7%) | 10 (1.2%) |
| Robetta M5 3DR5 | -7.02 | 89.8795 | 763 (91.3%) | 63 (7.5%) | 10 (1.2%) |

Robetta-Model-5 structure was chosen as the most appropriate model, which is shown in bold.

**Table S6.** Dis-continuous B-cell epitopes identified in the refined 3D structure of designed vaccine constructs of HPV58 by using Discotope 2.0

| S.No | Residue number | Amino acid | Contact number | Propensity score | DiscoTope score |
|------|----------------|------------|----------------|------------------|-----------------|
| 1    | 12             | ASN        | 5              | -3.272           | -3.471          |
| 2    | 25             | ILE        | 7              | -3.159           | -3.601          |
| 3    | 37             | ALA        | 0              | -3.037           | -2.688          |
| 4    | 38             | LYS        | 5              | -2.621           | -2.895          |
| 5    | 41             | ALA        | 0              | -3.549           | -3.141          |
| 6    | 42             | ALA        | 3              | -3.414           | -3.366          |
| 7    | 55             | LYS        | 6              | -3.291           | -3.602          |
| 8    | 99             | THR        | 0              | -1.665           | -1.474          |
| 9    | 101            | SER        | 3              | -1.96            | -2.079          |
| 10   | 103            | SER        | 0              | -2.842           | -2.515          |
| 11   | 107            | SER        | 6              | -2.739           | -3.114          |
| 12   | 130            | GLY        | 5              | -2.944           | -3.181          |
| 13   | 265            | GLY        | 8              | -2.67            | -3.283          |
| 14   | 266            | ASN        | 5              | -0.617           | -1.121          |
| 15   | 269            | THR        | 6              | -2.481           | -2.886          |
| 16   | 270            | ASN        | 7              | -2.764           | -3.251          |
| 17   | 284            | ALA        | 1              | -3.567           | -3.272          |
| 18   | 288            | SER        | 5              | -3.336           | -3.528          |

**Table S7.**

Statistical analysis of the TLR5-SGD58 docking result obtained by HADDOCK

| <b>No. of Clusters</b> | <b>HADDOCK score</b> | <b>Total interaction energy (Kcal mol<sup>-1</sup>)</b> | <b>Van der waal energy (Kcal mol<sup>-1</sup>)</b> | <b>Electrostatic energy (Kcal mol<sup>-1</sup>)</b> | <b>Desolvation energy (Kcal mol<sup>-1</sup>)</b> | <b>Restraints violation energy (Kcal mol<sup>-1</sup>)</b> | <b>Buried surface area A<sup>2</sup></b> |
|------------------------|----------------------|---------------------------------------------------------|----------------------------------------------------|-----------------------------------------------------|---------------------------------------------------|------------------------------------------------------------|------------------------------------------|
| Cluster 1              | -29.9 ± 6.0          | -34.8 ± 1.2                                             | -46.4 ± 5.5                                        | -513.0 ± 146.5                                      | 81.7 ± 32.4                                       | 912.9 ± 94.90                                              | 1918.1 ± 157.4                           |
| Cluster 2              | -37.3 ± 8.8          | -34.4 ± 0.8                                             | -52.3 ± 6.7                                        | -436.8 ± 100                                        | 78.6 ± 8.0                                        | 983.3 ± 22.17                                              | 1847.4 ± 117.3                           |
| Cluster 3              | -39.2 ± 4.9          | -20.4 ± 0.3                                             | -42.4 ± 8.9                                        | -432.1 ± 12.3                                       | 73.1 ± 8.6                                        | 949.3 ± 68.33                                              | 1720.4 ± 165.1                           |
| Cluster 4              | -62.5 ± 7.6          | -30.0 ± 0.4                                             | -58.3 ± 5.4                                        | -207.8 ± 37.3                                       | 43.1 ± 7.9                                        | 1192.9 ± 96.93                                             | 1914.4 ± 124.4                           |
| Cluster 5              | -48.1 ± 3.6          | -37.1 ± 0.6                                             | -46.0 ± 6.8                                        | -400.7 ± 54.1                                       | 74.0 ± 9.7                                        | 1003.1 ± 92.31                                             | 1732.7 ± 132.7                           |
| Cluster 6              | -54.2 ± 16.4         | -38.5 ± 0.1                                             | -40.2 ± 2.5                                        | -271.7 ± 28.9                                       | 56.9 ± 7.5                                        | 919.1 ± 128.25                                             | 1451.9 ± 71.5                            |
| Cluster 7              | -61.9 ± 23.9         | -21.0 ± 0.4                                             | -55.2 ± 6.8                                        | -179.0 ± 28.3                                       | 49.9 ± 11.9                                       | 1026.7 ± 45.95                                             | 1902.6 ± 247.8                           |
| Cluster 8              | -60.8 ± 9.5          | -36.4 ± 0.3                                             | -46.7 ± 9.5                                        | -270.4 ± 45.0                                       | 60.7 ± 2.8                                        | 1008.6 ± 167.01                                            | 1759.4 ± 121.9                           |
| Cluster 9              | -60.6 ± 14.6         | -30.0 ± 0.3                                             | -59.0 ± 4.8                                        | -196.2 ± 19.9                                       | 49.0 ± 11.8                                       | 1098.3 ± 114.91                                            | 1844.5 ± 122.5                           |
| Cluster 10             | -42.4 ± 19.9         | -3.4 ± 2.0                                              | -68.1 ± 6.8                                        | -254.8 ± 67.5                                       | 51.7 ± 15.6                                       | 1097.6 ± 117.31                                            | 2357.2 ± 101.3                           |
